# Supplementary material
Source: PubMed Central journal article supplement (PMC10695790)
Supplement: ajcr0013-5719-f7.pdf [file ajcr0013-5719-f7.pdf]

# PAM50 concordance increased with revised IHC subtyping

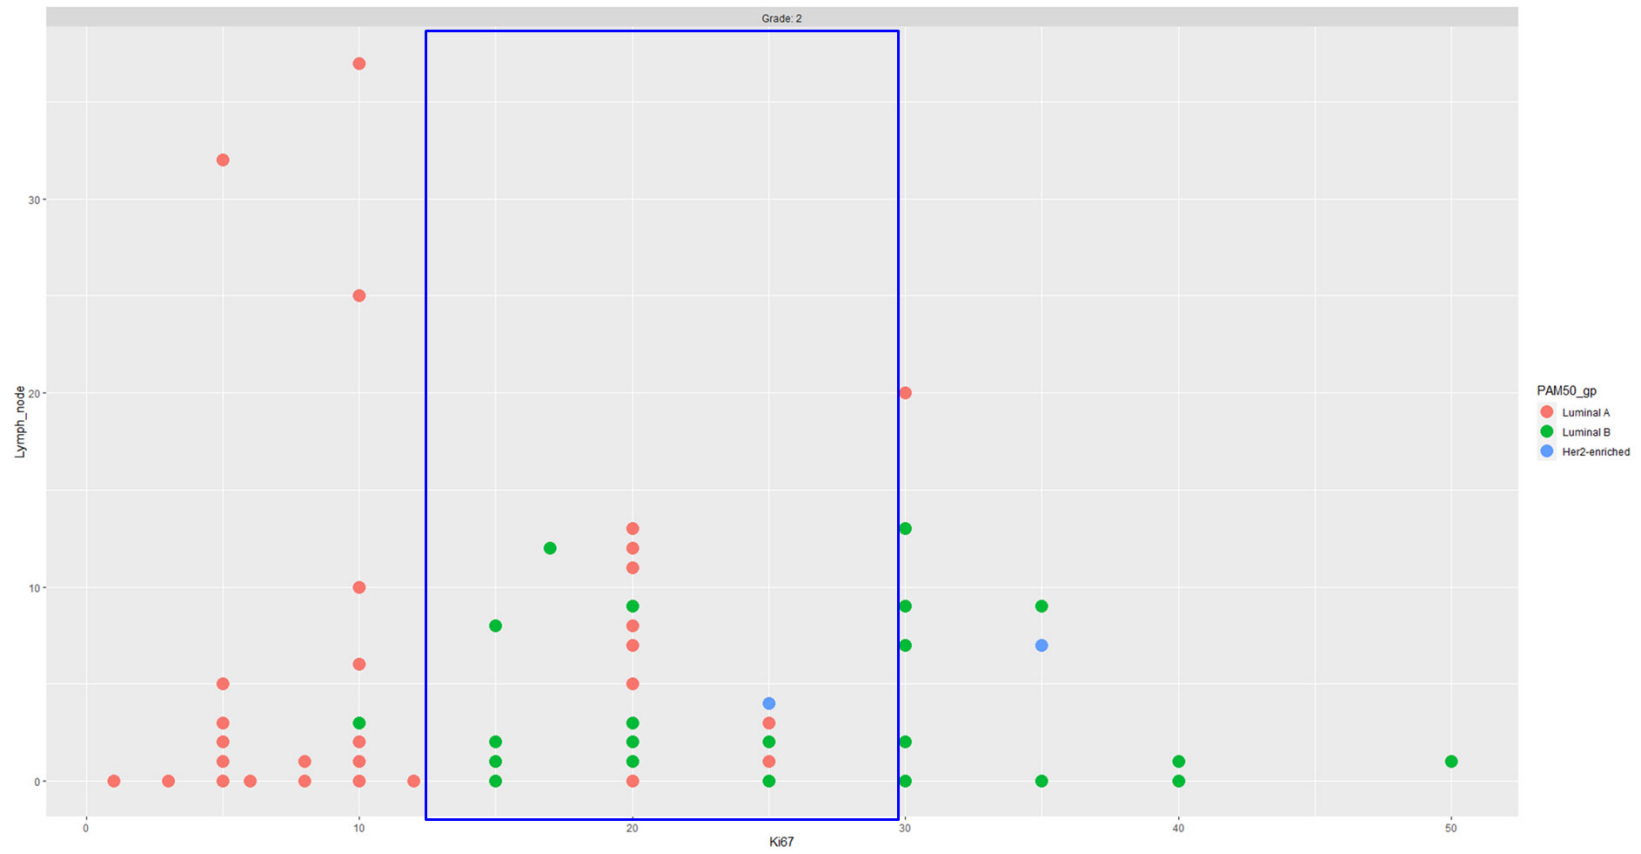

**Figure S1.** The distribution of PAM50 subtypes in breast cancer patients with Grade 2. X axis is Ki67 level and y axis is positive lymph node number.
